# Supplementary material for: Glucagon-Like Peptide Receptor Agonist Inhibits Angiotensin II-Induced Proliferation and Migration in Vascular Smooth Muscle Cells and Ameliorates Phosphate-Induced Vascular Smooth Muscle Cells Calcification
Source: PubMed Central journal article supplement — Diabetes Metab J. 2024 Jan 3;48(1):83–96. doi: 10.4093/dmj.2022.0363 (PMC10850275; doi:10.4093/dmj.2022.0363), 2024-01-03
Supplement: dmj-2022-0363-Supplementary-Fig-2.pdf [file dmj-2022-0363-Supplementary-Fig-2.pdf]

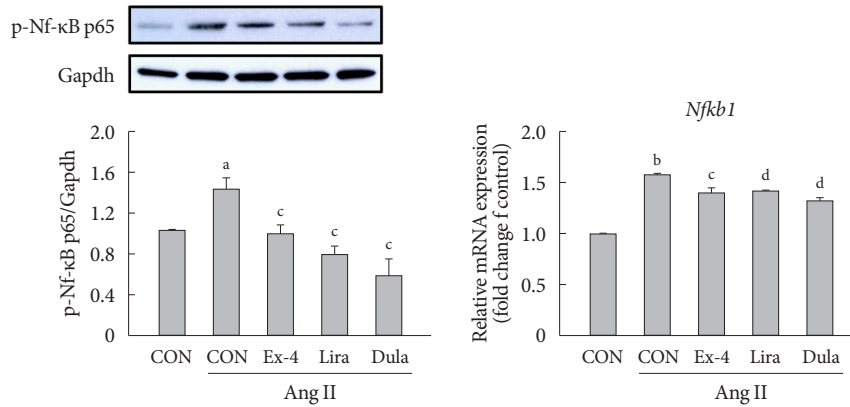

**Supplementary Fig. 2.** Exendin-4 (Ex-4), liraglutide (Lira), and dulaglutide (Dula) decrease nuclear factor- $\kappa$ B (Nf- $\kappa$ B) expression in vascular smooth muscle cells treated with angiotensin II (Ang II). A-10 cells are treated with 1  $\mu$ M Ang II, followed by treatment with or without 100 nM Ex-4, Lira, and Dula for 24 hours. The protein and gene expression of Nf- $\kappa$ B are analyzed using Western blotting and quantitative real-time polymerase chain reaction, respectively. Gapdh, glyceraldehyde-3-phosphate dehydrogenase; CON, control. <sup>a</sup> $P < 0.05$  and <sup>b</sup> $P < 0.01$  when compared with the control cells, <sup>c</sup> $P < 0.05$  and <sup>d</sup> $P < 0.01$  when compared with the Ang II-treated cells.
