# Supplementary material for: Glucagon-Like Peptide Receptor Agonist Inhibits Angiotensin II-Induced Proliferation and Migration in Vascular Smooth Muscle Cells and Ameliorates Phosphate-Induced Vascular Smooth Muscle Cells Calcification
Source: PubMed Central journal article supplement — Diabetes Metab J. 2024 Jan 3;48(1):83–96. doi: 10.4093/dmj.2022.0363 (PMC10850275; doi:10.4093/dmj.2022.0363), 2024-01-03
Supplement: dmj-2022-0363-Supplementary-Fig-3.pdf [file dmj-2022-0363-Supplementary-Fig-3.pdf]

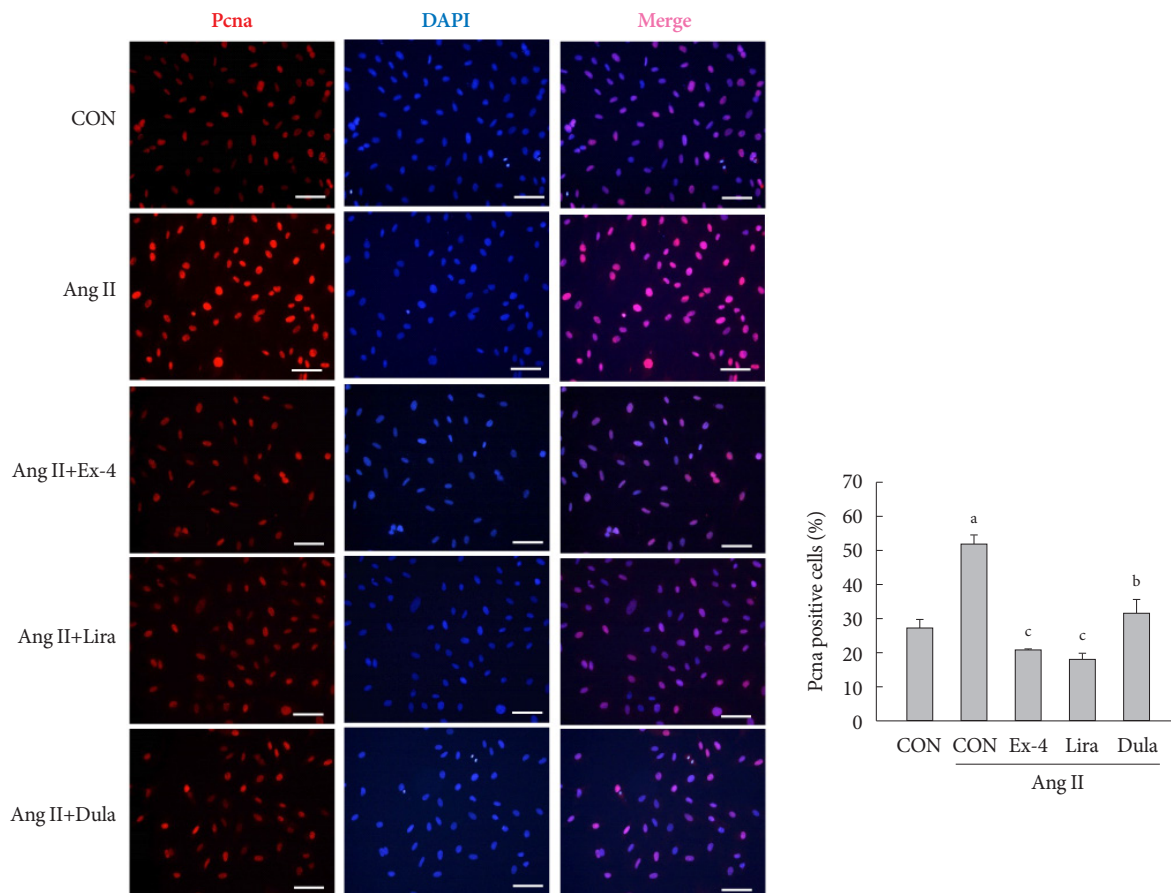

**Supplementary Fig. 3.** Detection of proliferating cell nuclear antigen (Pcna) by immunofluorescence. Cells are counterstained and quantified with Pcna (red) and 4',6-diamidino-2-phenylindole (DAPI; nuclear, blue). Scale bar 100  $\mu\text{m}$  ( $\times 100$  magnification). CON, control; Ex-4, exendin-4; Lira, liraglutide; Dula, dulaglutide. <sup>a</sup> $P < 0.01$  when compared with the control cells, <sup>b</sup> $P < 0.05$  and <sup>c</sup> $P < 0.01$  when compared with the angiotensin II (Ang II)-treated cells.
