# Supplementary material for: Glucagon-Like Peptide Receptor Agonist Inhibits Angiotensin II-Induced Proliferation and Migration in Vascular Smooth Muscle Cells and Ameliorates Phosphate-Induced Vascular Smooth Muscle Cells Calcification
Source: PubMed Central journal article supplement — Diabetes Metab J. 2024 Jan 3;48(1):83–96. doi: 10.4093/dmj.2022.0363 (PMC10850275; doi:10.4093/dmj.2022.0363), 2024-01-03
Supplement: dmj-2022-0363-Supplementary-Fig-6.pdf [file dmj-2022-0363-Supplementary-Fig-6.pdf]

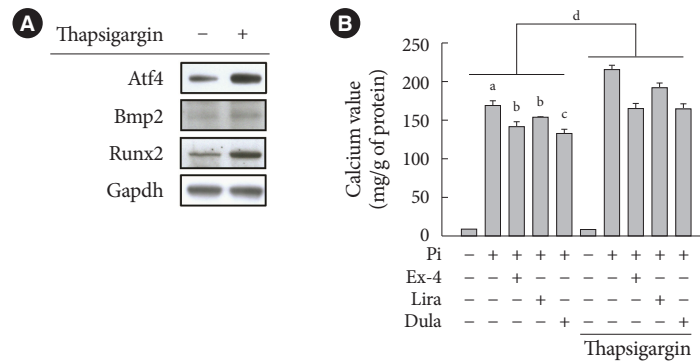

**Supplementary Fig. 6.** Thapsigargin-induced activating transcription factor 4 (ATF4) activation reverses the anti-calcification effect by glucagon-like peptide-1 receptor agonists. A-10 cells pre-exposed to 0.1  $\mu$ M thapsigargin for 24 hours are treated with 4 mM inorganic phosphate (Pi), followed by treatment with or without 100 nM exendin-4 (Ex-4), liraglutide (Lira), and dulaglutide (Dula) for 7 days. (A) The protein expression of Atf4, bone morphogenic protein 2 (Bmp2), and runt-related transcription factor-2 (Runx2) are analyzed using Western blotting and (B) levels of calcium deposition are assessed by calcium levels. <sup>a</sup>*P*<0.01 when compared with the control cells, <sup>b</sup>*P*<0.05 and <sup>c</sup>*P*<0.01 when compared with the Pi-treated cells, <sup>d</sup>*P*<0.05 when compared with each thapsigargin-untreated groups.
